# Supplementary material for: Mixed metal node effect in zeolitic imidazolate frameworks
Source: Royal Society of Chemistry journal article supplement (doi:10.1039/d2ra00744d), 2022-01-01
Supplement: d2ra00744d1.pdf [file d2ra00744d1.pdf]

## Supporting Information

### Mixed metallic node effect in zeolitic imidazolate frameworks

**Table S1.** Densities ( $\text{g}/\text{cm}^3$ ) of Zn-ZIF-62 from experiments and density functional theory (DFT) and classical force field (FF) calculations. The solvent content was taken from the literature<sup>1</sup> and added to the density calculation for the DFT and FF results.

| Zn-ZIF-62 crystal |       |
|-------------------|-------|
| Exp. <sup>1</sup> | 1.494 |
| Current Exp.      | 1.467 |
| DFT (PBE-D3)      | 1.537 |
| FF                | 1.546 |

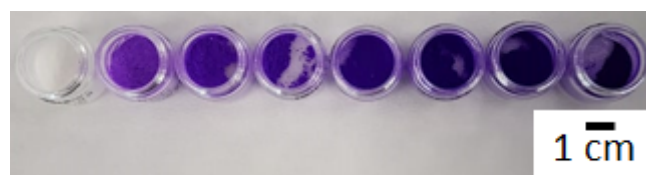

**Fig. S1.** Image of Co/Zn-ZIF-62 samples (from the left 0.0, 0.1, 0.2, 0.4, 0.6, 0.8, 0.9, 1.0) revealing the change in the intensity of the purple colour with increasing cobalt content.

#### UV-VIS Absorption analysis of Co/Zn-ZIF-62

UV-VIS was carried out to verify that the intensity of purple colour of the bimetallic ZIF-62 crystals correlates with the cobalt content. Calibration curve was used by dissolving 0.0482 grams of 1.0-ZIF-62 using 10 mL 1 M HCl. The solution was used for a full UV-VIS absorption spectrum using a Varian Cary 50 Bio UV-Visible Spectrophotometer. The result showed a peak absorption at 510 nm (green), which has red as its complimentary colour. The solution was then diluted, using 1 M HCl with the following solution:HCl ratios: 9:1, 8:2, 7:3, and 6:4. The samples were then measured on a thermo spectronic helios epsilon spectrophotometer at 510 nm to measure the absorption. The data was used to make a calibration curve, using a linear fit with  $R^2 = 0.999$ . For each Co and Zn-containing ZIF-62 sample, a weighed amount was dissolved, using 1 M HCl and their absorption were measured at 510 nm. A theoretical absorption for a pure Co-ZIF-62 was calculated for each sample to reveal the  $[\text{Co}]/[\text{Co}+\text{Zn}]$  ratio. Fig S2. displays the observed relative Co content against the

fraction of Co used in the synthesis. The figure displays a fairly good agreement between synthesis condition and the content of cobalt in the sample.

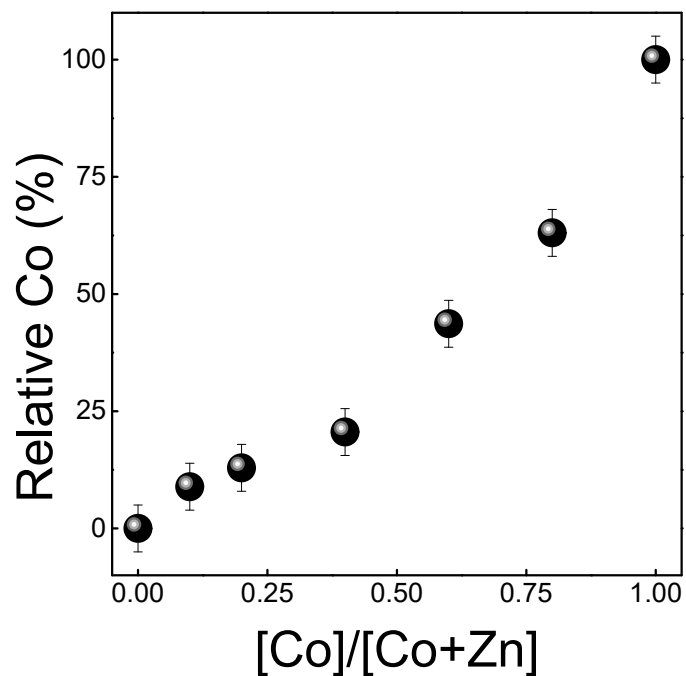

**Fig S2.** Observed cobalt content plotted against the ratio used during synthesis of Co/Zn-ZIF-62.

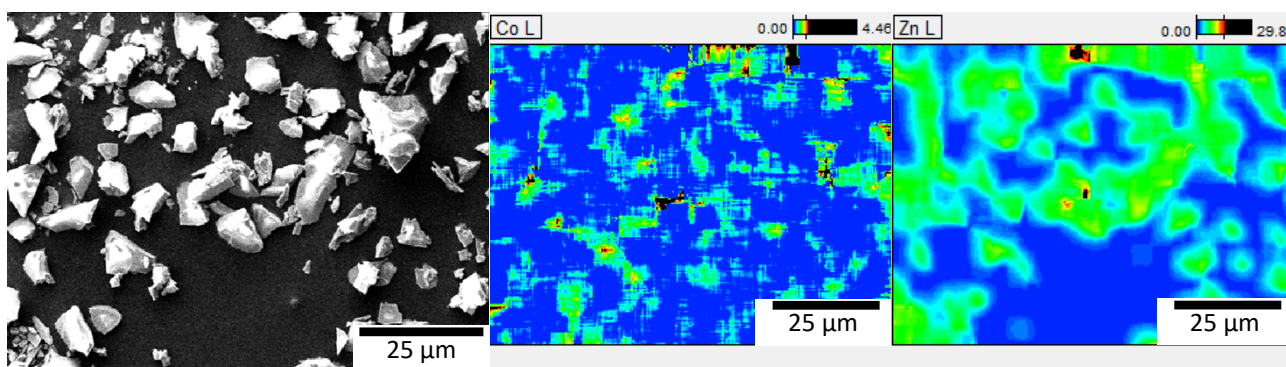

**Fig S3.** SEM image (left) of the area detected by EDX for 0.0-ZIF-62 sample, and the EDX elemental mapping for the cobalt (middle column) and zinc (right column), using a contoured color gradient.

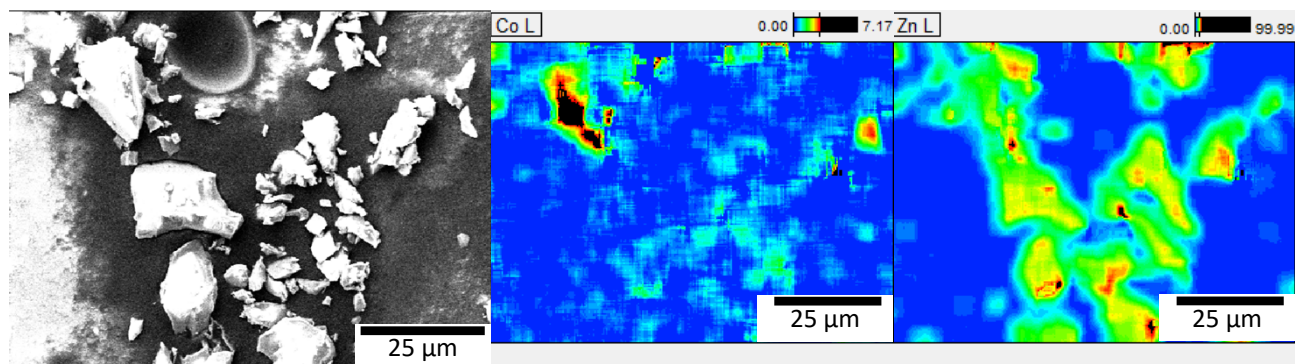

**Fig. S4.** SEM image (left) of the area detected by EDX for 0.1-ZIF-62 sample, and the EDX elemental mapping for the cobalt (middle column) and zinc (right column), using a contoured color gradient.

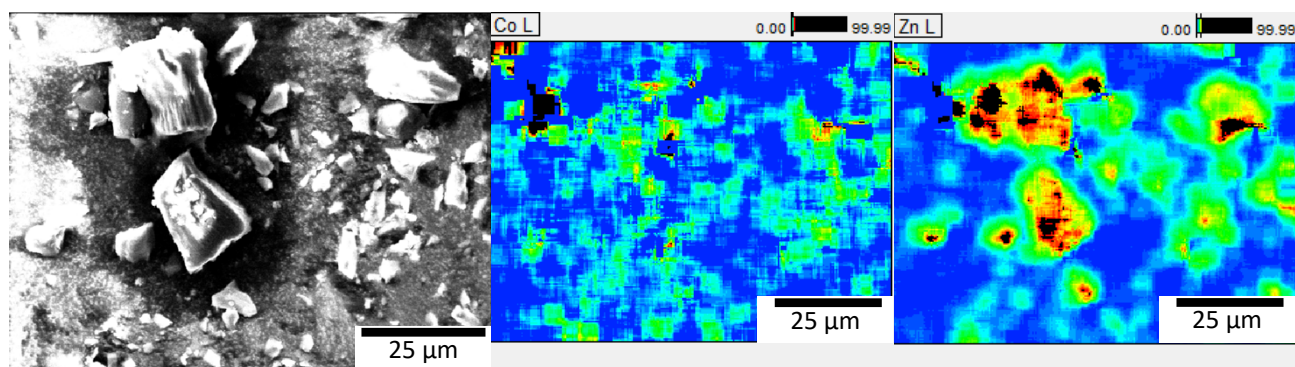

**Fig. S5.** SEM image (left) of the area detected by EDX for 0.2-ZIF-62 sample, and the EDX elemental mapping for the cobalt (middle column) and zinc (right column), using a contoured color gradient.

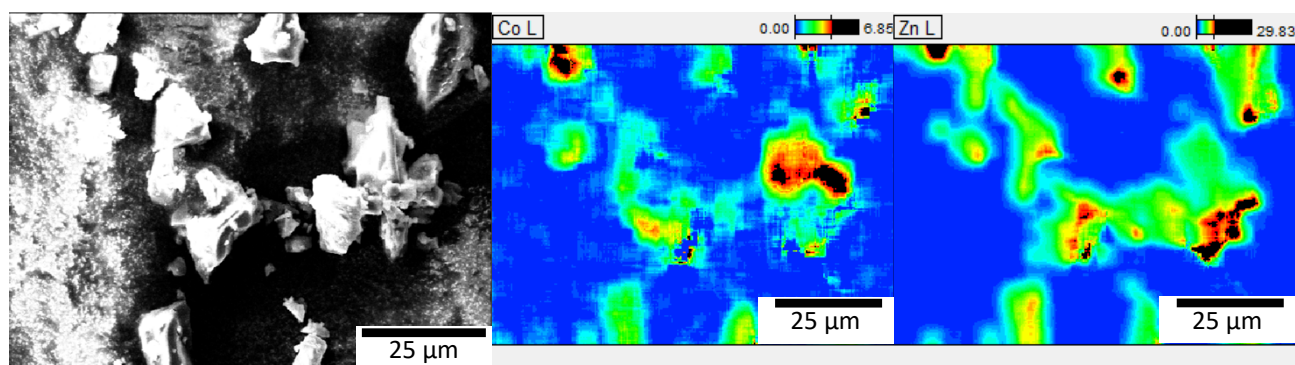

**Fig. S6.** SEM image (left) of the area detected by EDX for 0.4-ZIF-62 sample, and the EDX elemental mapping for the cobalt (middle column) and zinc (right column), using a contoured color gradient.

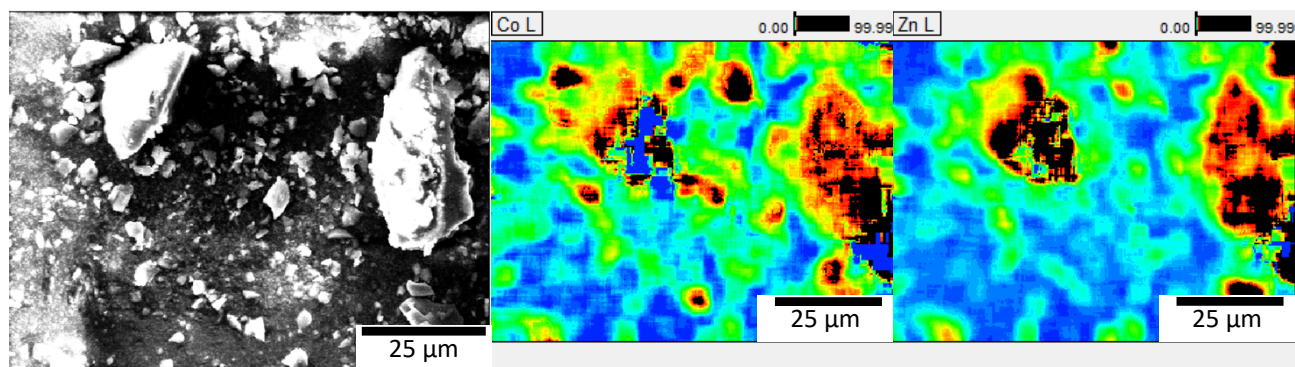

**Fig. S7.** SEM image (left) of the area detected by EDX for 0.6-ZIF-62 sample, and the EDX elemental mapping for the cobalt (middle column) and zinc (right column), using a contoured color gradient.

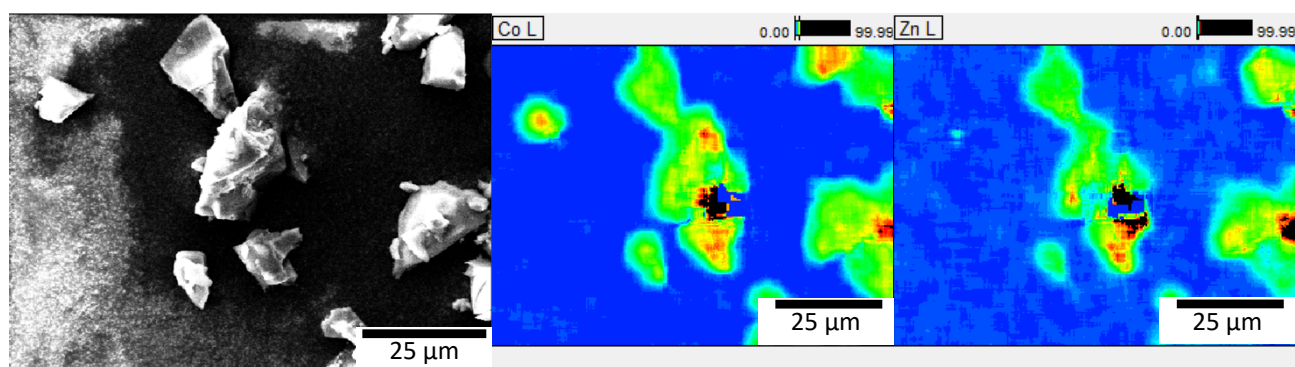

**Fig. S8.** SEM image (left) of the area detected by EDX for 0.8-ZIF-62 sample, and the EDX elemental mapping for the cobalt (middle column) and zinc (right column), using a contoured color gradient.

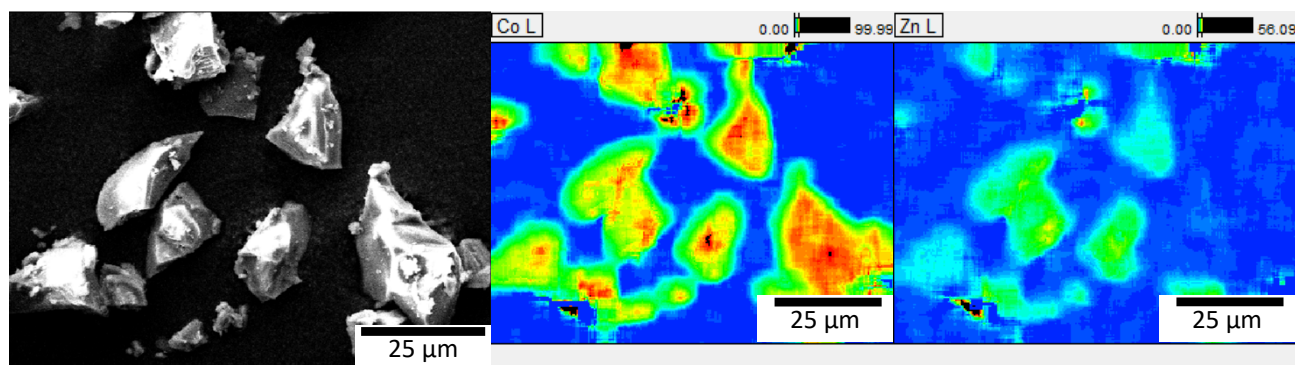

**Fig. S9.** SEM image (left) of the area detected by EDX for 0.9-ZIF-62 sample, and the EDX elemental mapping for the cobalt (middle column) and zinc (right column), using a contoured color gradient.



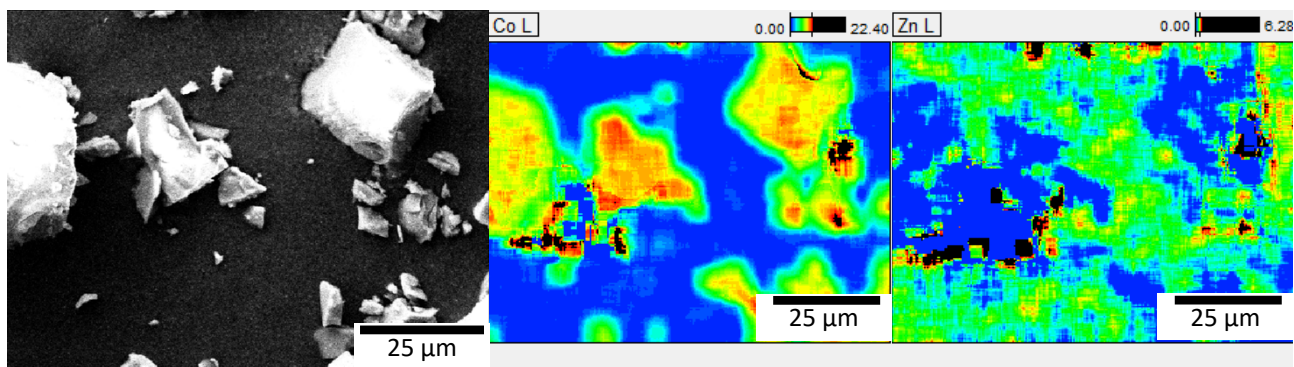

**Fig. S10.** SEM image (left) of the area detected by EDX for 1.0-ZIF-62 sample, and the EDX elemental mapping for the cobalt (middle column) and zinc (right column), using a contoured color gradient.

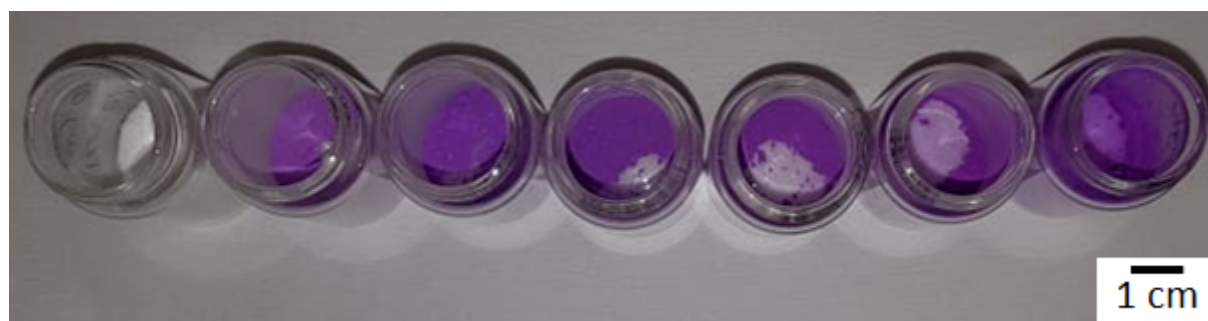

**Fig. S11.** Image of Co/Zn-ZIF-new samples (from the left 0.0, 0.1, 0.2, 0.4, 0.6, 0.8, 1.0), revealing the change in the intensity of the purple colour with increasing cobalt content.

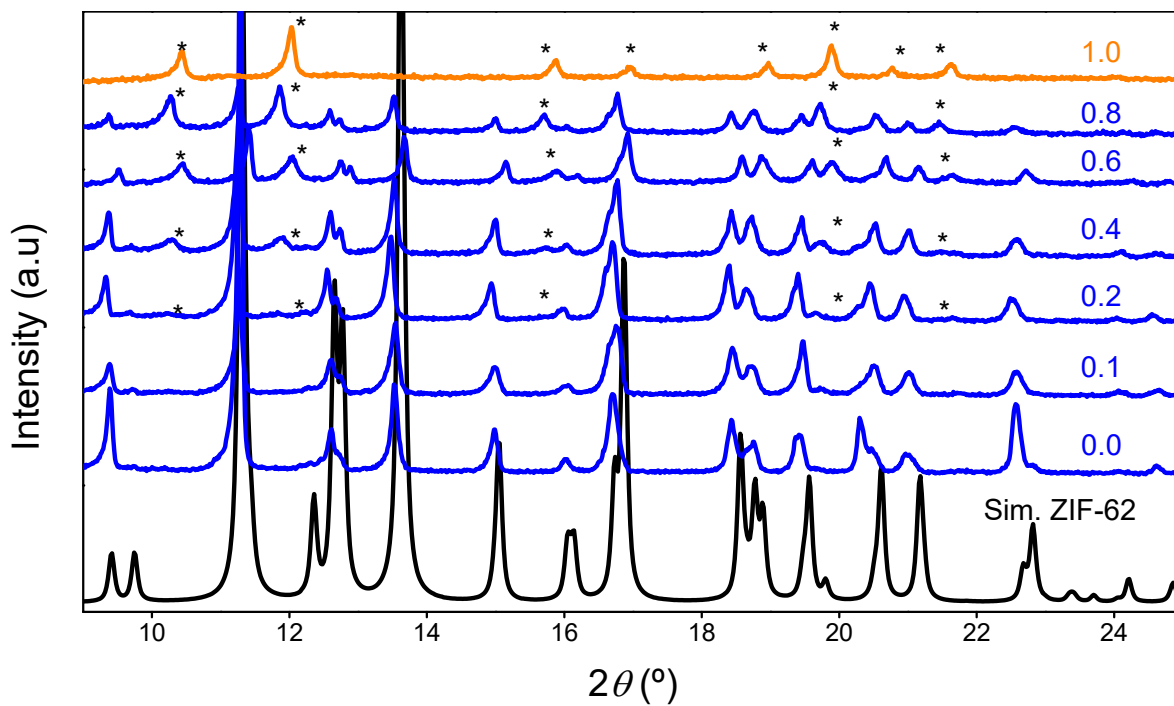

**Fig. S12.** X-ray diffraction patterns of Co/Zn-ZIF-new, showing the emergence of a new crystalline phase, as Co substitutes for Zn. Emerging new peaks are designated with \*.

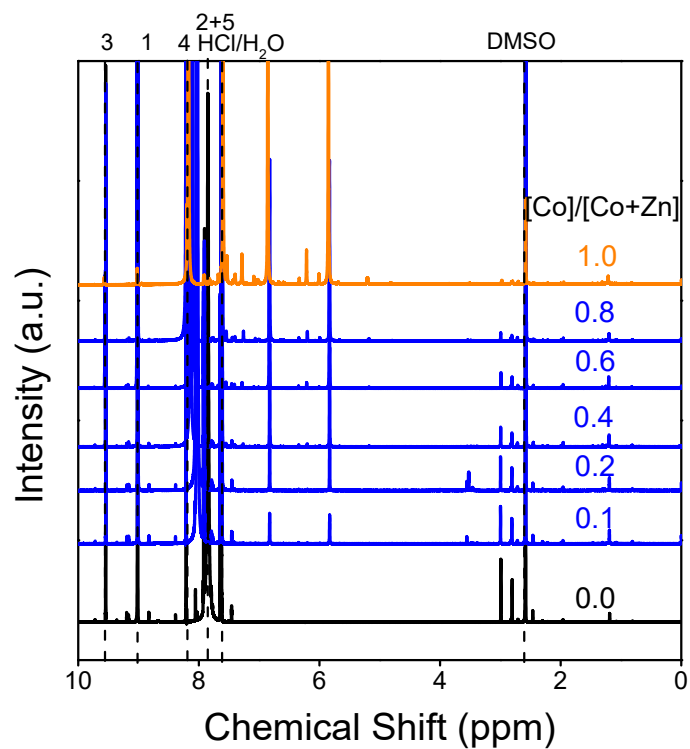

**Fig. S13.** Liquid  $^1\text{H}$ -NMR spectra of Co/Zn-ZIF-new samples. The emergence of two new peaks as cobalt substitutes for zinc reveals the formation of a new organic linker during the synthesis.

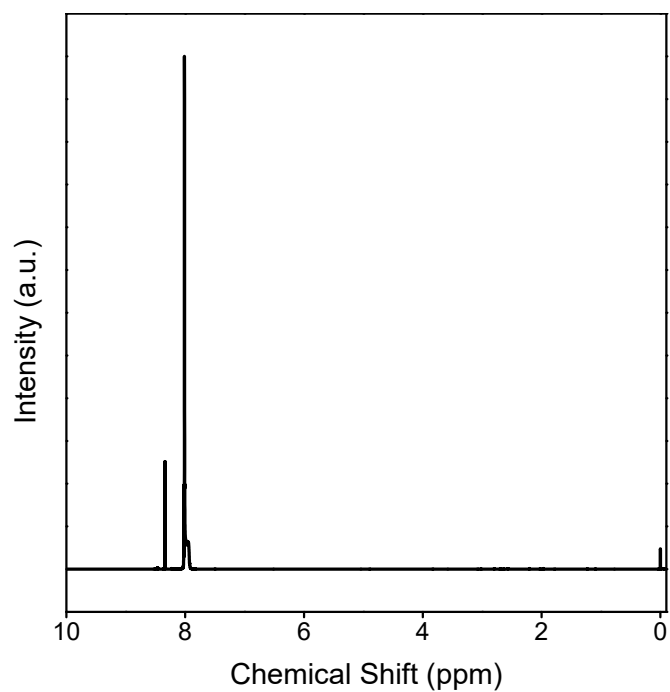

**Fig. S14.** Liquid  $^1\text{H}$ -NMR spectrum of 4-nitroimidazole purchased from Sigma Aldrich (97%).

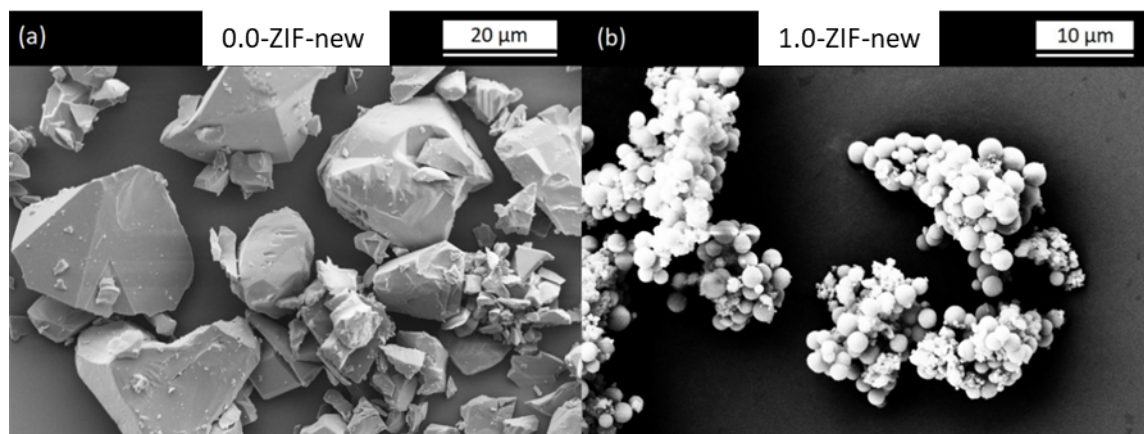

**Fig. S15.** SEM images of crystalline ZIF-new samples. (a) 0.0-ZIF-new. (b) 1.0-ZIF-new



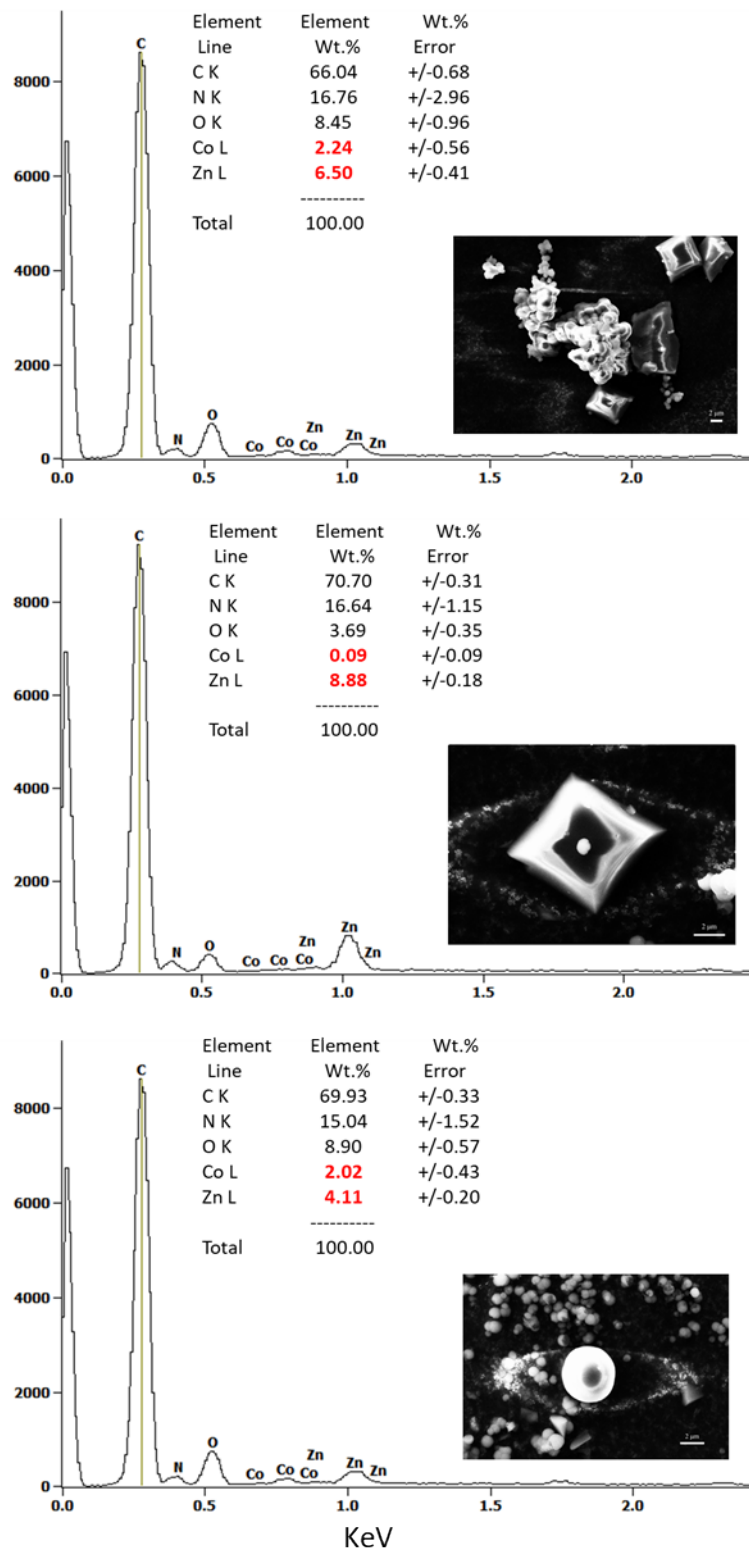

**Fig. S16.** EDX elemental analysis of different particles belonging to the 0.6-ZIF-new sample, showing chemical heterogeneity in the sample.

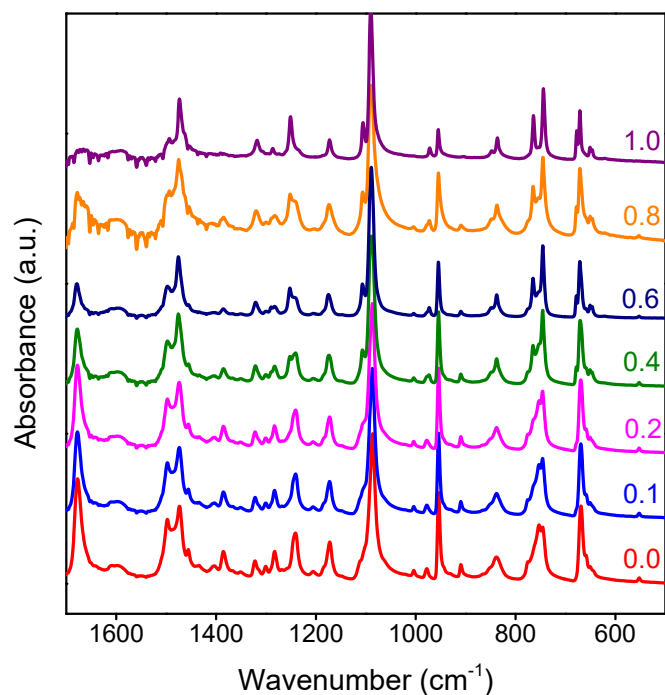

**Figure S17.** ATR FT-IR spectrum of Co/Zn-ZIF-new samples.

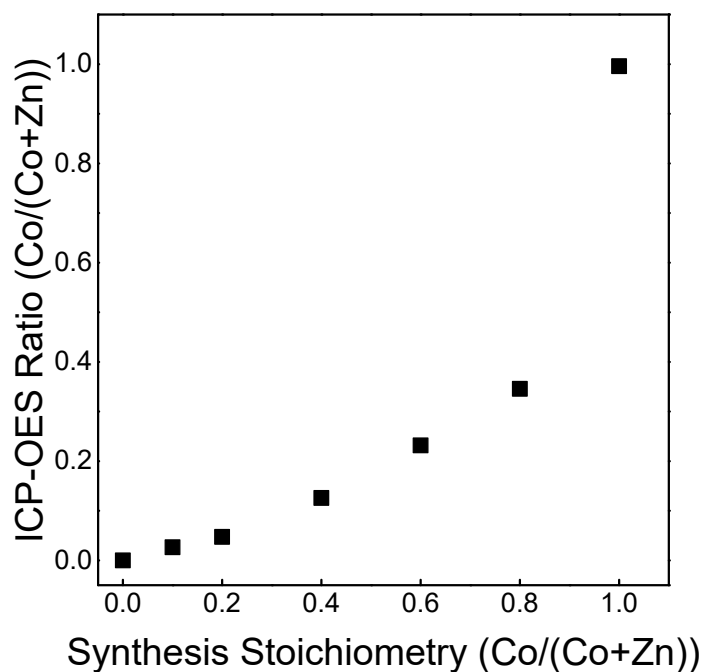

**Fig. S18.** Measured Co/(Co+Zn) ratio vs. synthesis stoichiometry for Co/Zn-ZIF-new samples. Inductively coupled plasma – optical emission spectroscopy (ICP-OES) (Prodigy 7, Teledyne Leeman Labs) analysis was used to quantify the zinc to cobalt ratio. The standard calibration solutions used

contains  $1 \mu\text{g mL}^{-1}$  Zn, Ni Cr and  $0.5 \mu\text{g mL}^{-1}$  Ba, Mn, Cu in 3%  $\text{HNO}_3$  (National Institute of Metrology, China). Sample solutions were prepared by dissolving a precisely weighed amount of ZIF sample into 2 mL of an  $\text{HNO}_3$  solution. The primary solutions were transferred to 50 mL volumetric flasks readied for measurements. For quantitative analysis of Zn and Co, the wavelengths 206.200 nm and 228.615 nm were used, respectively.

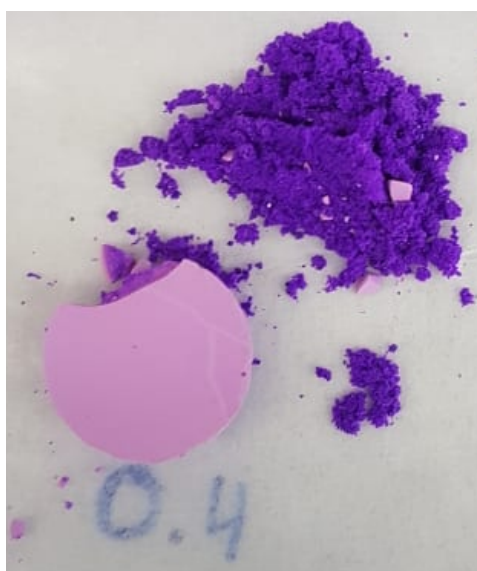

**Fig. S19.** Image of 0.4-ZIF-new, revealing a rich purple phase and a lighter phase being separated during the drying process.

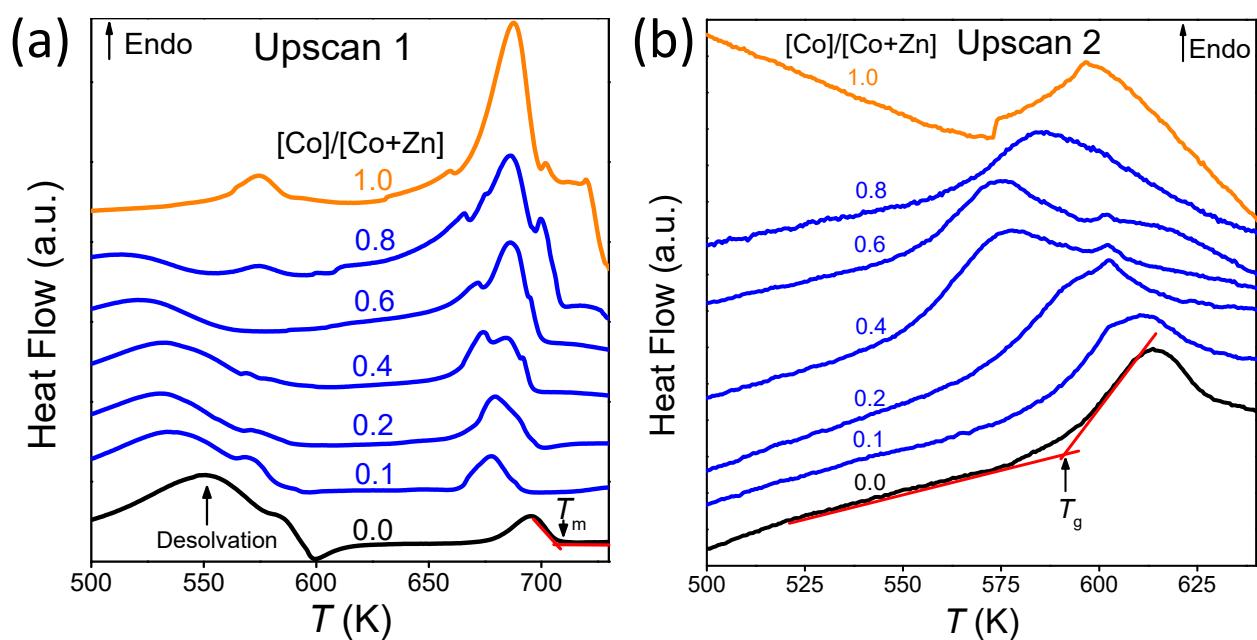

**Fig. S20.** DSC analysis of Co/Zn-ZIF-new. (a) first upscan (heating rate of 10 K min<sup>-1</sup>) revealing the endothermic solvent release and melting point and partial decomposition. (b) second upscan (10 K min<sup>-1</sup>) revealing the glass transition peak onset.

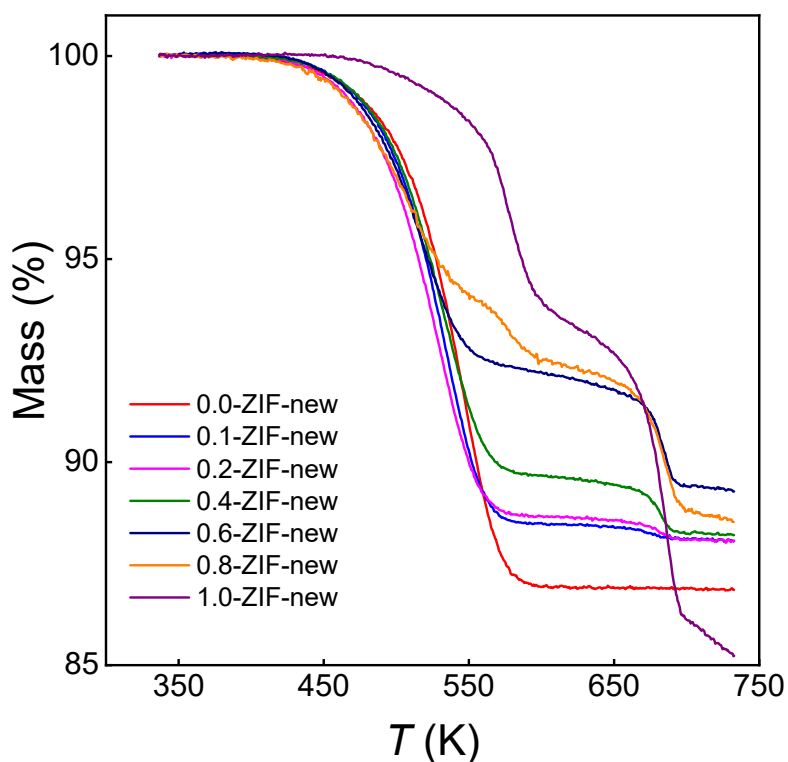

**Figure S21.** TGA data of synthesized Co/Zn-ZIF-new crystals during the first upscan.

## Biphasic Decomposition Gas Analysis

Thermal gravimetric analyses (TGA) were performed using a Jupiter 449 simultaneous thermal analysis instrument (Netzsch, Selb, Germany) coupled with a 403C Aëoloss mass spectrometer (MS), with a heating rate of  $10\text{ °C min}^{-1}$  in an argon atmosphere. The ionized species of the gases released from the heat-treated sample were detected by the MS. The MS data were compared to the gas ionic spectra of the relevant gases from the NIST Standard Reference Database<sup>1</sup>. The gases we identified based on the  $m/z$  numbers and their relative intensity. The signals from MS are not quantitative.

The mass loss for the sample 0.0-ZIF-new is related to the release of  $\text{N}_2$  and/or  $\text{CO}$  ( $m/z=28$ ),  $\text{H}_2\text{O}$  ( $m/z=18$ ),  $\text{NO}$  ( $m/z=30$ ), DMF ( $m/z=73, 44, 42, 29$ ), and  $\text{NH}_3$  ( $m/z=17, 16$ ). The ionic spectra for the first mass loss of the sample 1.0-ZIF-new indicate release of  $\text{H}_2\text{O}$ ,  $\text{N}_2$  and/or  $\text{CO}$ ,  $\text{NO}$ , and  $\text{NH}_3$ , while the spectra for the second mass at  $>370\text{ °C}$  indicate release of  $\text{NH}_3$ ,  $\text{NO}$ , and small amounts of  $\text{CH}_4$  ( $m/z=15$ ) and  $\text{CO}_2$ . These data show that the organic constituents (e.g., DMF) in great part degrade to smaller molecules (e.g.,  $\text{N}_2$ ,  $\text{NO}$ ,  $\text{NH}_3$ ) when leaving the analyzed sample.

---

<sup>1</sup> P.J. Linstrom and W.G. Mallard, Eds., NIST Chemistry WebBook, NIST Standard Reference Database Number 69, National Institute of Standards and Technology 2005, Gaithersburg MD, 20899, <http://webbook.nist.gov>, (accessed 30.8.2021)



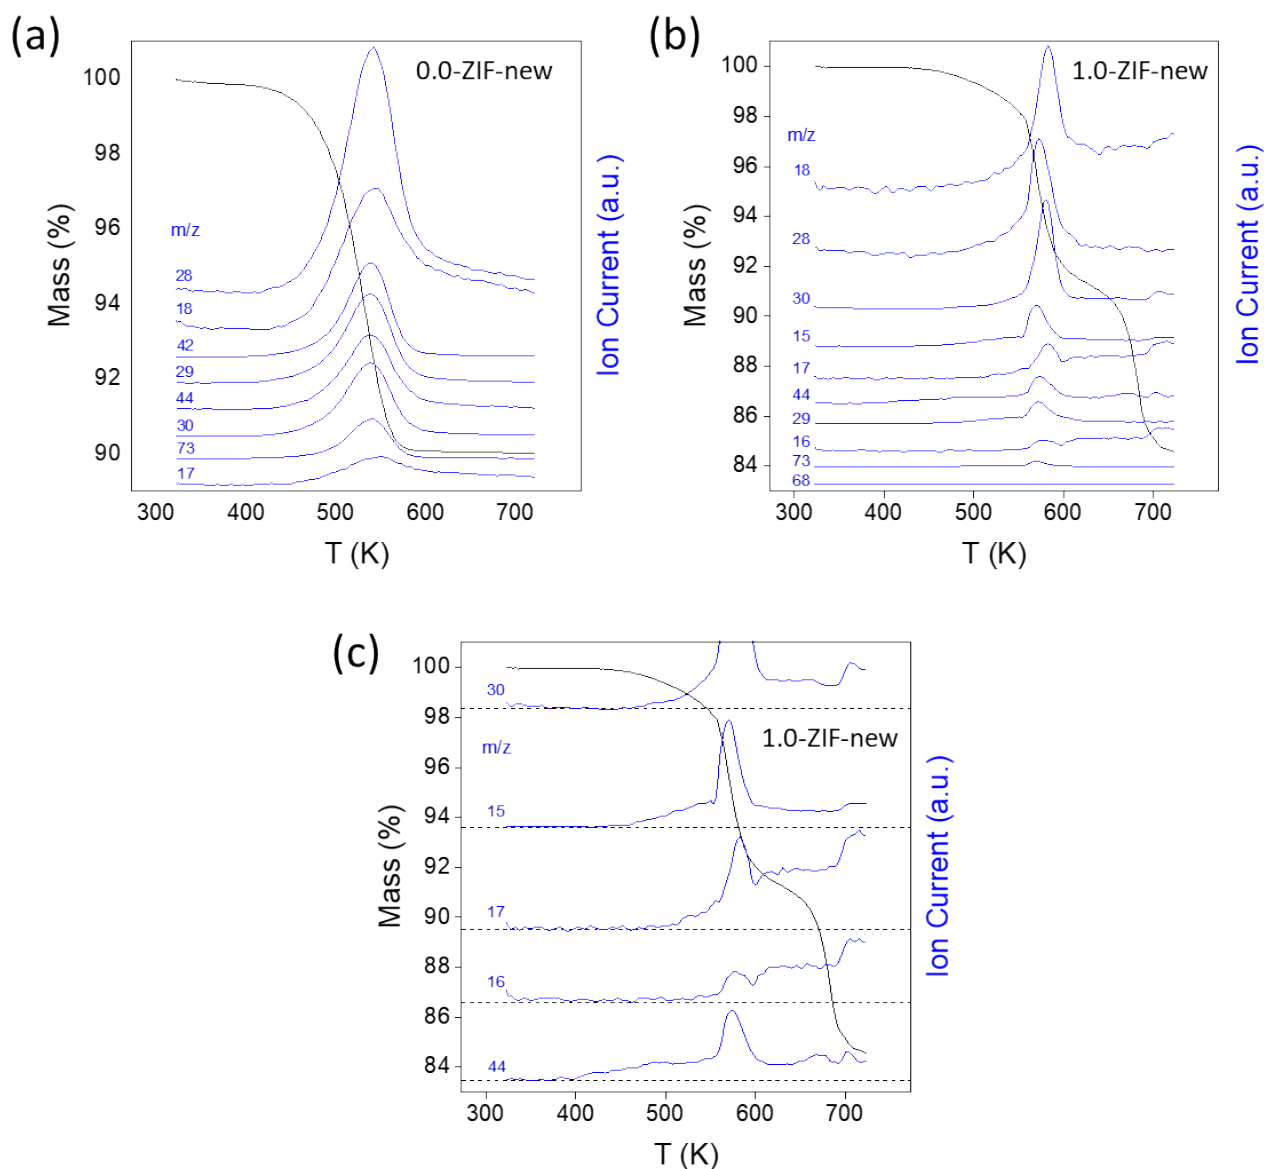

**Fig. S22.** DTA-MS spectra of the samples (a) 0.0-ZIF-new and (b,c) sample 1.0-ZIF-new. (c) focuses on the second mass at  $>370$  °C and shows the ionic signals of the gases that remain high above their baselines (thin dotted lines).

## References

- 1 T. D. Bennett, Y. Yue, P. Li, A. Qiao, H. Tao, N. G. Greaves, T. Richards, G. I. Lampronti, S. A. T. Redfern, F. Blanc, O. K. Farha, J. T. Hupp, A. K. Cheetham and D. A. Keen, *J. Am. Chem. Soc.*, 2016, **138**, 3484–3492.
- 2 L. Frenzel-Beyme, M. Kloß, R. Pallach, S. Salamon, H. Moldenhauer, J. Landers, H. Wende, J. Debus and S. Henke, *J. Mater. Chem. A*, 2019, **7**, 985–990.
